# Supplementary material for: Immunomodulatory Activity of Octenyl Succinic Anhydride Modified Porang (Amorphophallus oncophyllus) Glucomannan on Mouse Macrophage-Like J774.1 Cells and Mouse Primary Peritoneal Macrophages
Source: MDPI journal article supplement (doi:10.3390/molecules22071187), 2017-07-15
Supplement: s1 [file s1]

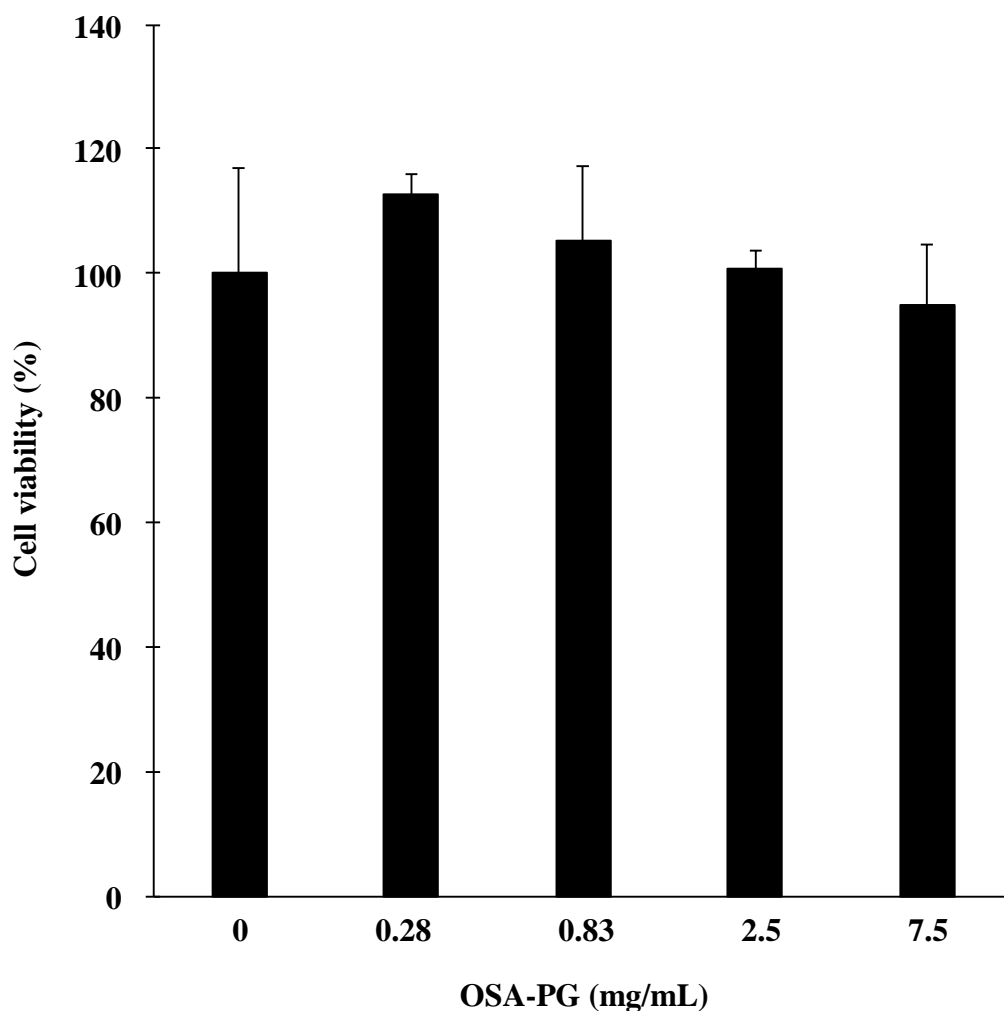

Effect of octenyl succinic anhydride-modified porang glucomannan (OSA-PG) on the viability of J774.1 cells. Viability of J774.1 cells treated with various concentrations of OSA-PG was evaluated by the WST-8 assay. J774.1 cells were cultured in 96-well culture plates at  $3.0 \times 10^5$  cells/mL in 10% FBS-RPMI 1640 medium at 37 °C overnight. The cells were then treated with various concentrations of OSA-PG in 1640 medium containing the 10% WST-8 solution for 20 min at 37 °C. The absorbance at 450 nm was then measured in a microplate reader. Results are shown as mean  $\pm$  standard deviation in triplicate.
